# Supplementary material for: Self-Organization in Dilute Aqueous Solutions of Thermoresponsive Star-Shaped Six-Arm Poly-2-Alkyl-2-Oxazines and Poly-2-Alkyl-2-Oxazolines
Source: MDPI journal article supplement (doi:10.3390/polym13091429), 2021-04-29
Supplement: s1 [file s1]

## Supplementary Materials

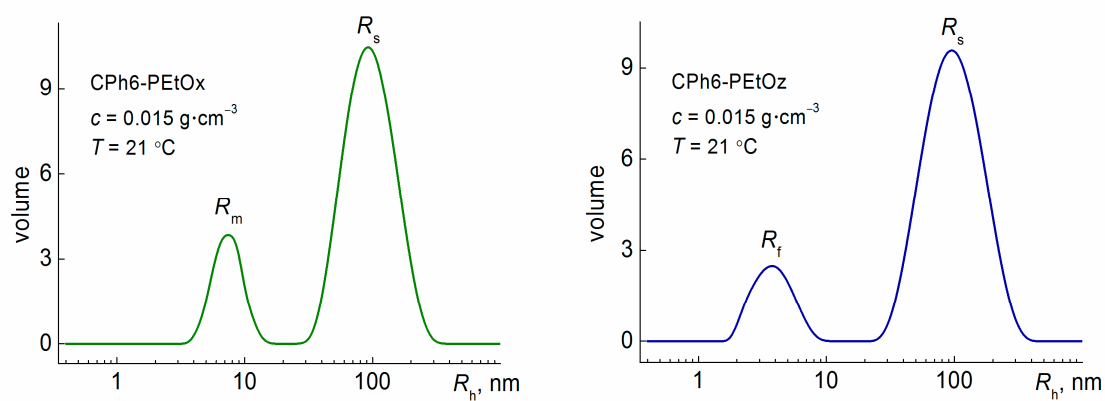

**Figure S1.** The distributions of scattering species over hydrodynamic radii for solutions of star-shaped CPh6-PEtOx and CPh6-PEtOz.  $R_f$ ,  $R_m$ , and  $R_s$ , are the hydrodynamic radii of macromolecules (fast mode), small aggregates (middle mode) and large aggregates (slow mode), respectively
